# Supplementary material for: Genetic Diversity and Natural Selection on the Thrombospondin-Related Adhesive Protein (TRAP) Gene of Plasmodium Falciparum on Bioko Island, Equatorial Guinea and Global Comparative Analysis
Source: Research Square preprint supplement (doi:10.21203/rs.3.rs-113859/v1), 2020-12-01
Supplement: Supplementary file 1 [file d43728655e66f4ace694b334.xlsx]

## Sheet: Sheet1
Domain	SNP	n	%	Bioko	Congo	Gambia	Ghana	Guinea	Senegal	Malawi	Mali	Percentage of African%	Laos	Myanmar	Thailand	Vietnam	Cambodia	Bangladesh	Percentage of Asian%
SS (DⅠ)	L 15F	1	0.000711238	0	0	0	0	0	1	0	0		0	0	0	0	0	0
	D 19Y	1	0.000711238	0	0	0	0	0	0	0	1		0	0	0	0	0	0
	K 37I	1	0.000711238	0	0	0	0	0	0	0	1		0	0	0	0	0	0
	R 39S	62	0.0440967	11	4	2	24	4	6	9	2	1	0	0	0	0	0	0	0
	R 39H	30	0.0213371	2	4	0	0	0	0	23	1	1	0	0	0	0	0	0	0
	R 39L	37	0.0263158	0	0	5	13	1	7	0	11	1	0	0	0	0	0	0	0
	N 44D	34	0.0241821	1	0	1	18	2	10	0	2	1	0	0	0	0	0	0	0
A-Domain (DⅡ)	E 46Q	333	0.236842	38	11	10	83	10	43	36	18	0.747748	12	0	0	19	49	4	0.252252
	E 46R	7	0.00497866	0	0	0	1	4	2	0	0	1	0	0	0	0	0	0	0
	L 49V	19	0.0135135	4	0	1	7	2	3	0	2	1	0	0	0	0	0	0	0
	H 62N	38	0.027027	2	1	2	20	3	4	0	6	1	0	0	0	0	0	0	0
	H 62Y	24	0.0170697	2	0	0	18	2	0	1	1	1	0	0	0	0	0	0	0
	N 66K	417	0.296586	15	1	3	36	3	23	1	8	0.215827	10	17	53	15	226	6	0.784173
	D 83E	702	0.499289	28	10	5	38	9	9	29	5	0.189459	34	45	92	52	325	21	0.810541
	N 84S	171	0.121622	0	0	0	0	0	0	0	0	0	21	12	20	18	87	13	1
	A 90L	180	0.128023	0	0	0	0	0	0	0	0	0	16	25	28	26	76	9	1
	A 90V	760	0.540541	60	26	21	124	26	73	58	28	0.547368	22	16	42	26	226	12	0.452632
	S 91N	1345	0.956615	107	49	32	206	47	104	105	38	0.511524	42	45	94	60	393	23	0.488476
	V 92I	487	0.346373	0	0	0	1	0	0	0	0	0.00205339	22	41	86	33	290	14	0.997947
	V 92T	1	0.000711238	0	0	0	0	0	0	0	0		0	0	0	0	0	1
	R 98K	629	0.447368	54	13	6	76	17	40	38	17	0.414944	19	12	48	31	249	9	0.585056
	I116S	187	0.133001	23	14	15	60	15	26	21	11	0.989305	0	0	0	0	0	2	0.0106952
	I116T	2	0.00142248	0	1	0	0	0	0	1	0	1	0	0	0	0	0	0	0
	K119R	180	0.128023	19	6	4	23	6	16	14	6	0.522222	14	5	3	18	44	2	0.477778
	L122I	29	0.0206259	8	1	3	4	5	5	2	1	1	0	0	0	0	0	0	0
	S123N	262	0.186344	8	6	6	73	16	21	13	6	0.568702	12	13	24	7	44	13	0.431298
	S123R	2	0.00142248	0	0	0	1	0	0	0	0	0.5	0	0	0	0	0	1	0.5
	Y128F	293	0.208393	33	21	14	97	16	38	58	11	0.982935	0	0	0	0	2	3	0.0170648
	K130R	1310	0.931721	112	52	29	182	45	90	105	30	0.492366	42	45	102	60	393	23	0.507634
	T134S	520	0.369844	28	17	9	75	14	27	44	8	0.426923	12	5	47	20	210	4	0.573077
	N154S	103	0.0732575	0	0	0	0	0	0	0	0	0	13	7	16	11	53	3	1
	N154K	1	0.000711238	0	0	0	0	0	0	0	0		0	0	0	0	0	1
	D166N	193	0.137269	33	11	11	66	6	25	33	6	0.989637	0	0	0	0	0	2	0.0103627
	D170G	35	0.0248933	0	1	0	21	2	2	5	4	1	0	0	0	0	0	0	0
	D170N	13	0.00924609	0	1	0	0	0	2	10	0	1	0	0	0	0	0	0	0
	K173N	3	0.00213371	0	0	3	0	0	0	0	0	1	0	0	0	0	0	0	0
	R176S	13	0.00924609	0	0	0	0	0	0	0	0	0	0	0	0	1	12	0	1
	K177N	3	0.00213371	0	0	1	0	0	2	0	0	1	0	0	0	0	0	0	0
	S179N	1152	0.819346	81	40	18	148	24	73	81	24	0.424479	42	45	102	60	393	21	0.575521
	S179K	14	0.00995733	0	0	2	6	0	6	0	0	1	0	0	0	0	0	0	0
	S179H	3	0.00213371	0	0	0	2	1	0	0	0	1	0	0	0	0	0	0	0
	D180G	1	0.000711238	0	0	0	0	0	1	0	0		0	0	0	0	0	0
	R181L	442	0.314367	32	15	12	119	15	46	40	19	0.674208	12	7	20	11	90	4	0.325792
	V203A	18	0.0128023	6	0	0	0	0	1	11	0	1	0	0	0	0	0	0	0
	S208T	9	0.00640114	0	1	0	0	0	0	8	0	1	0	0	0	0	0	0	0
	D209E	1	0.000711238	0	0	0	0	0	0	1	0		0	0	0	0	0	0
	D209N	1	0.000711238	0	0	0	0	0	1	0	0		0	0	0	0	0	0
	K211I	8	0.0056899	2	2	0	0	0	0	4	0	1	0	0	0	0	0	0	0
TSR (DⅢ)	A219E	24	0.0170697	0	0	0	1	0	0	0	1	0.0833333	6	0	0	2	10	4	0.916667
	A219T	23	0.0163585	10	5	0	0	0	0	5	0	0.869565	0	0	0	0	0	3	0.130435
	A219S	1	0.000711238	1	0	0	0	0	0	0	0		0	0	0	0	0	0
	E221A	6	0.00426743	1	2	0	0	0	0	3	0	1	0	0	0	0	0	0	0
	G228V	43	0.0305832	4	1	2	20	2	12	0	2	1	0	0	0	0	0	0	0
	S243N	30	0.0213371	8	3	0	4	0	0	15	0	1	0	0	0	0	0	0	0
	V255A	1	0.000711238	1	0	0	0	0	0	0	0		0	0	0	0	0	0
	T261A	1	0.000711238	1	0	0	0	0	0	0	0		0	0	0	0	0	0
	R264S	1	0.000711238	1	0	0	0	0	0	0	0		0	0	0	0	0	0
	L269S	15	0.0106686	0	0	0	8	0	2	0	5	1	0	0	0	0	0	0	0
	E271K	21	0.014936	0	1	4	9	1	3	0	3	1	0	0	0	0	0	0	0
	E271D	3	0.00213371	0	0	0	0	0	0	3	0	1	0	0	0	0	0	0	0
	E271V	1	0.000711238	1	0	0	0	0	0	0	0		0	0	0	0	0	0
	S275G	1	0.000711238	1	0	0	0	0	0	0	0		0	0	0	0	0	0
	E276G	2	0.00142248	0	1	0	0	1	0	0	0	1	0	0	0	0	0	0	0
	L277I	444	0.315789	44	27	17	138	30	73	45	25	0.898649	4	8	1	5	21	6	0.101351
	L277T	9	0.00640114	1	0	0	0	0	0	8	0	1	0	0	0	0	0	0	0
	Q278R	51	0.0362731	14	3	1	13	1	10	7	2	1	0	0	0	0	0	0	0
	Q278K	21	0.014936	0	0	2	15	0	0	0	4	1	0	0	0	0	0	0	0
	Q280L	4	0.00284495	0	4	0	0	0	0	0	0	1	0	0	0	0	0	0	0
	Q280H	12	0.00853485	0	0	0	9	0	3	0	0	1	0	0	0	0	0	0	0
	C281R	1	0.000711238	1	0	0	0	0	0	0	0		0	0	0	0	0	0
	E282V	1	0.000711238	0	0	0	0	0	0	1	0		0	0	0	0	0	0
Proline-rich Region(DⅣ)	R285G	8	0.0056899	0	1	2	1	1	3	0	0	1	0	0	0	0	0	0	0
	R285S	9	0.00640114	0	0	0	0	0	0	9	0	1	0	0	0	0	0	0	0
	R285K	1	0.000711238	0	0	0	1	0	0	0	0		0	0	0	0	0	0
	C286G	1	0.000711238	1	0	0	0	0	0	0	0		0	0	0	0	0	0
	L287P	1357	0.965149	113	52	31	203	47	104	105	35	0.508475	42	45	104	60	393	23	0.491525
	R290W	407	0.289474	72	25	6	96	8	23	59	6	0.724816	1	11	37	5	55	3	0.275184
	R290Q	2	0.00142248	0	1	0	0	1	0	0	0	1	0	0	0	0	0	0	0
	E291A	1	0.000711238	1	0	0	0	0	0	0	0		0	0	0	0	0	0
	D297H	760	0.540541	34	22	24	103	33	79	37	28	0.473684	38	29	45	49	220	19	0.526316
	D297E	65	0.0462304	10	6	2	23	4	9	6	0	0.923077	0	0	2	0	2	1	0.0769231
	D297Q	121	0.0860597	17	3	0	2	0	0	8	0	0.247934	1	8	25	5	52	0	0.752066
	E298D	23	0.0163585	0	1	0	0	0	0	22	0	1	0	0	0	0	0	0	0
	E298K	4	0.00284495	0	0	0	0	0	0	4	0	1	0	0	0	0	0	0	0
	P299S	18	0.0128023	6	0	0	8	1	3	0	0	1	0	0	0	0	0	0	0
	E300K	1	0.000711238	1	0	0	0	0	0	0	0		0	0	0	0	0	0
	Q303E	214	0.152205	9	18	9	66	12	42	13	11	0.841121	3	5	3	1	19	3	0.158879
	D309A	1	0.000711238	1	0	0	0	0	0	0	0		0	0	0	0	0	0
	F311S	188	0.133713	37	15	5	60	3	16	49	2	0.994681	0	0	0	0	0	1	0.00531915
	A312V	209	0.148649	8	3	8	31	12	15	10	3	0.430622	7	3	17	15	72	5	0.569378
	A312S	190	0.135135	37	15	5	60	3	17	49	2	0.989474	0	0	0	0	0	2	0.0105263
	A312D	3	0.00213371	0	0	1	0	0	2	0	0	1	0	0	0	0	0	0	0
	V313F	62	0.0440967	2	5	1	13	0	6	5	4	0.580645	3	5	1	1	15	1	0.419355
	E314Q	257	0.182788	56	21	7	70	6	29	51	5	0.953307	0	2	1	0	6	3	0.0466926
	K315E	156	0.110953	14	15	5	43	13	29	22	15	1	0	0	0	0	0	0	0
	N317K	1178	0.837838	20	45	23	182	37	86	97	32	0.443124	41	45	104	56	387	23	0.556876
	N317E	113	0.0803698	80	2	2	7	1	7	2	1	0.902655	1	0	0	4	6	0	0.0973451
	E318K	38	0.027027	5	2	2	7	1	7	2	1	0.710526	1	0	0	4	6	0	0.289474
	N319H	1	0.000711238	0	0	0	0	0	1	0	0		0	0	0	0	0	0
	N319T	1	0.000711238	1	0	0	0	0	0	0	0		0	0	0	0	0	0
	E327D	1	0.000711238	1	0	0	0	0	0	0	0		0	0	0	0	0	0
	P328S	3	0.00213371	0	0	0	0	0	0	0	0	0	1	0	0	1	1	0	1
	S329P	1	0.000711238	1	0	0	0	0	0	0	0		0	0	0	0	0	0
	N331H	1	0.000711238	1	0	0	0	0	0	0	0		0	0	0	0	0	0
	E334D	1	0.000711238	1	0	0	0	0	0	0	0		0	0	0	0	0	0
	G337D	74	0.0526316	5	4	5	19	9	23	1	7	0.986486	0	0	0	0	0	1	0.0135135
	G337V	18	0.0128023	0	0	1	6	2	6	0	3	1	0	0	0	0	0	0	0
	P340R	186	0.13229	20	15	8	51	12	44	21	15	1	0	0	0	0	0	0	0
	N341K	46	0.0327169	0	0	0	0	0	0	0	0	0	3	1	5	10	27	0	1
	G342E	11	0.00782361	0	0	0	2	0	0	0	0	0.181818	0	1	6	0	0	2	0.818182
	F343S	1	0.000711238	1	0	0	0	0	0	0	0		0	0	0	0	0	0
	D344Y	5	0.00355619	0	0	0	0	0	0	0	0	0	0	0	0	1	4	0	1
	N348K	1	0.000711238	0	0	0	0	1	0	0	0		0	0	0	0	0	0
	P349T	2	0.00142248	0	1	0	0	1	0	0	0	1	0	0	0	0	0	0	0
	E350S	2	0.00142248	0	0	1	0	0	0	0	1	1	0	0	0	0	0	0	0
	E350P	1	0.000711238	0	0	0	0	1	0	0	0		0	0	0	0	0	0
	P353S	80	0.056899	19	6	1	12	3	7	7	2	0.7125	5	4	0	0	13	1	0.2875
	P353E	3	0.00213371	2	1	0	0	0	0	0	0	1	0	0	0	0	0	0	0
	P355L	26	0.0184922	0	0	3	9	1	11	1	1	1	0	0	0	0	0	0	0
	E359Q	463	0.329303	71	27	12	93	20	31	49	11	0.678186	21	6	24	24	63	11	0.321814
	E361K	131	0.0931721	13	4	7	46	9	26	13	11	0.984733	0	0	0	0	0	2	0.0152672
	E371V	1	0.000711238	0	0	0	0	0	0	0	0		0	0	0	0	1	0
	K378E	1	0.000711238	1	0	0	0	0	0	0	0		0	0	0	0	0	0
	N406Y	4	0.00284495	2	1	0	1	0	0	0	0	1	0	0	0	0	0	0	0
	D407N	18	0.0128023	3	1	0	7	2	3	1	1	1	0	0	0	0	0	0	0
	D410E	7	0.00497866	0	0	0	3	0	3	0	1	1	0	0	0	0	0	0	0
	Y412S	341	0.242532	0	0	0	1	0	0	0	0	0.00293255	31	26	56	43	169	15	0.997067
	Y412N	179	0.127312	12	2	9	78	13	35	11	16	0.98324	0	0	2	0	0	1	0.0167598
	S419P	1350	0.960171	107	50	29	218	45	106	91	37	0.505926	42	45	104	60	393	23	0.494074
	K421N	402	0.285917	49	35	11	122	18	58	58	12	0.902985	4	3	1	8	19	4	0.0970149
	V422I	3	0.00213371	2	1	0	0	0	0	0	0	1	0	0	0	0	0	0	0
	Q429E	1	0.000711238	0	0	0	0	0	0	0	0		0	0	0	0	0	1
	D431N	1	0.000711238	0	0	0	0	0	1	0	0		0	0	0	0	0	0
	P432H	1	0.000711238	0	1	0	0	0	0	0	0		0	0	0	0	0	0
	N438H	1	0.000711238	0	0	0	0	0	1	0	0		0	0	0	0	0	0
	T451A	2	0.00142248	0	2	0	0	0	0	0	0	1	0	0	0	0	0	0	0
	R452H	58	0.0412518	11	9	4	11	2	9	9	3	1	0	0	0	0	0	0	0
	R461I	6	0.00426743	4	1	0	0	0	0	1	0	1	0	0	0	0	0	0	0
	S462P	5	0.00355619	0	2	0	1	1	0	1	0	1	0	0	0	0	0	0	0
	N464D	10	0.00711238	0	0	0	0	0	0	0	0	0	0	1	7	0	0	2	1
	R465I	64	0.0455192	11	1	5	17	1	0	7	5	0.734375	4	3	0	0	9	1	0.265625
	R465T	1	0.000711238	1	0	0	0	0	0	0	0		0	0	0	0	0	0
	H467Y	595	0.423186	46	15	13	71	21	25	29	18	0.4	22	24	74	33	193	11	0.6
	N469D	845	0.600996	72	41	24	145	32	71	69	26	0.568047	24	24	76	33	195	13	0.431953
	H473Y	285	0.202703	49	22	9	52	13	18	31	11	0.719298	2	6	28	0	40	4	0.280702
	P474H	155	0.110242	35	21	5	36	10	18	26	4	1	0	0	0	0	0	0	0
	K487Q	263	0.187055	35	16	6	53	10	28	23	8	0.680608	14	5	11	17	27	10	0.319392
	A489G	1260	0.896159	98	44	26	180	38	86	88	34	0.471429	42	45	104	60	393	22	0.528571
	A489S	1	0.000711238	0	0	0	0	0	0	1	0		0	0	0	0	0	0
	G490R	16	0.0113798	1	8	0	2	1	1	3	0	1	0	0	0	0	0	0	0
	G490S	64	0.0455192	4	14	0	2	4	0	40	0	1	0	0	0	0	0	0	0
	G490E	133	0.0945946	13	2	3	57	11	25	10	12	1	0	0	0	0	0	0	0
	G490A	32	0.0227596	11	1	2	10	1	0	4	3	1	0	0	0	0	0	0	0
	D492E	30	0.0213371	0	0	1	14	2	6	0	7	1	0	0	0	0	0	0	0
TM (DⅤ)	F517L	1	0.000711238	0	0	0	1	0	0	0	0		0	0	0	0	0	0
	V518G	1	0.000711238	1	0	0	0	0	0	0	0		0	0	0	0	0	0
	Y526F	57	0.0405405	0	0	0	0	0	0	0	0	0	0	1	16	0	40	0	1
CTD (DⅥ)	D541Y	1	0.000711238	1	0	0	0	0	0	0	0		0	0	0	0	0	0
	R551E	1	0.000711238	0	0	0	0	0	0	0	0		0	0	0	0	0	0
	R551K	2	0.00142248	2	0	0	0	0	0	0	0	1	0	0	0	0	0	0	0
	E554D	2	0.00142248	0	0	0	0	0	0	0	0	0	0	0	2	0	0	0	1
	Bold indicates SNPs shared by two continents, and blue font indicates SNPs that appear only once
